# Supplementary material for: Putative Horizontally Acquired Genes, Highly Transcribed during Yersinia pestis Flea Infection, Are Induced by Hyperosmotic Stress and Function in Aromatic Amino Acid Metabolism
Source: PubMed Central journal article supplement (PMC7221256; doi:10.1128/jb.00733-19), 2020-05-11
Supplement: JB.00733-19-s0001.pdf [file JB.00733-19-s0001.pdf]

1 SUPPLEMENTAL FILES FOR:

2 Putative horizontally acquired genes, highly transcribed during *Yersinia pestis* flea  
3 infection, are induced by hyperosmotic stress and function in aromatic amino acid  
4 metabolism

5  
6 Luary C. Martínez-Chavarría<sup>1,2</sup>, Janelle Sagawa<sup>1</sup>, Jessica Irons<sup>3</sup>, Angela K. Hinz<sup>1,4</sup>, Athena  
7 Lemon<sup>1</sup>, Telmo Graça<sup>1</sup>, Diana M. Downs<sup>3</sup> and Viveka Vadyvaloo<sup>1\*</sup>

8  
9 1. Paul G. Allen School for Global Animal Health, Washington State University, Pullman,  
10 Washington, USA

11 2. Departamento de Patología, Facultad de Medicina Veterinaria y Zootecnia, Universidad  
12 Nacional Autónoma de México, Mexico

13 3. Department of Microbiology, University of Georgia, 120, Cedar Street, Athens, GA  
14 30602-2605, USA.

15 4. Department of Chemistry and Biochemistry, Gonzaga University, 502 East Boone Avenue,  
16 Spokane WA

17  
18 \***Corresponding author:** Viveka Vadyvaloo, Paul G. Allen School for Global Animal Health,  
19 Washington State University, Pullman, WA 99164. Tel: 5093356043 Fax: 5093356328  
20 email: [vvadyvaloo@wsu.edu](mailto:vvadyvaloo@wsu.edu)

21  
22 Running title: Putative horizontally acquired genes of *Y. pestis*

23  
24 Key words: *Yersinia pestis*, flea infection, hyperosmolarity stress

25 **TABLE S1 Bacterial strains and plasmids used in this study**

26 -----

| 27 | Strain or plasmid                                         | Genotype or description                                                    | Reference or source  |
|----|-----------------------------------------------------------|----------------------------------------------------------------------------|----------------------|
| 28 | -----                                                     |                                                                            |                      |
| 29 | <b>Strains</b>                                            |                                                                            |                      |
| 30 | <u><i>Y. pestis</i></u>                                   |                                                                            |                      |
| 31 | KIM6+                                                     | Pgm+, pCD-, pMT1+, pPst+, parental strain                                  | (1)                  |
| 32 | VV150                                                     | KIM6+ derivative, $\Delta y3550$                                           | This study           |
| 33 | VV151                                                     | KIM6+ derivative, $\Delta y3555$                                           | This study           |
| 34 | VV278                                                     | KIM6+ derivative, $\Delta y3550\Delta y3551$                               | This study           |
| 35 | VV279                                                     | KIM6+ derivative, $\Delta y3555\Delta y3550$                               | This study           |
| 36 | VV280                                                     | KIM6+ derivative,                                                          |                      |
| 37 |                                                           | $\Delta y3555\Delta y3554\Delta y3553\Delta y355x\Delta y3551\Delta y3550$ |                      |
| 38 |                                                           | ('All' mutant)                                                             | This study           |
| 39 | VV267                                                     | KIM6+ derivative, $\Delta y3555\Delta y3554\Delta y3553$                   | (2)                  |
| 40 | VV670                                                     | KIM6+ derivative, WT <i>glmS-pstS::kan<sup>R</sup></i>                     | This study           |
| 41 |                                                           |                                                                            |                      |
| 42 | <u><i>E. coli</i></u>                                     |                                                                            |                      |
| 43 | DH5 $\alpha$                                              | laboratory cloning strain                                                  | Invitrogen           |
| 44 | DG44                                                      | $\Delta tyrB \Delta aspC$                                                  | CGSC Strain#: 5802   |
| 45 | DM12740                                                   | BL21A1 contains pET20b with <i>S. enterica ridA</i>                        | (3)                  |
| 46 | DM16279                                                   | BL21AI contains pET28a:: <i>y3551</i>                                      | This study           |
| 47 |                                                           |                                                                            |                      |
| 48 | <u><i>Salmonella enterica</i> serovar Typhimurium LT2</u> |                                                                            |                      |
| 49 | DM15847                                                   | wildtype contains pBAD24 (empty vector)                                    | Downs lab collection |
| 50 | DM16509                                                   | DM15847 contains pTRc99A                                                   | This study           |

|    |                     |                                                 |                      |
|----|---------------------|-------------------------------------------------|----------------------|
| 51 | DM16510             | DM15847 contains pTRc55                         | This study           |
| 52 | DM16150             | DM15847 <i>aspC789::Km</i>                      | Downs lab collection |
| 53 | DM16434             | DM16150 contains pTRc99A (empty vector)         | This study           |
| 54 | DM16435             | DM16150 contains pTRc55                         | This study           |
| 55 | DM14828             | <i>S. enterica</i> wildtype                     | Downs lab collection |
| 56 | DM16281             | DM14828 pET28a:: <i>y3550</i>                   | This study           |
| 57 | DM16282             | DM14828 pET28a:: <i>y3551</i>                   | This study           |
| 58 | DM14829             | DM14828 derived <i>ridA1::Tn10(Tc)</i>          | (4)                  |
| 59 | DM16283             | DM14829 contains pET28a:: <i>y3550</i>          | This study           |
| 60 | DM16284             | DM14829 contains pET28a:: <i>y3551</i>          | This study           |
| 61 | DM16293             | DM14829 contains pET28b (empty vector)          | This study           |
| 62 | DM16294             | DM14829 contains pET28b:: <i>ridA</i> (K12)     | This study           |
| 63 |                     |                                                 |                      |
| 64 | <b>Plasmids</b>     |                                                 |                      |
| 65 | pC26-pac            | pSC101 derivative contains promoterless         |                      |
| 66 |                     | <i>luxCDABE</i> reporter, Km <sup>R</sup>       | (5)                  |
| 67 | pCS:: <i>P55</i>    | pCS26-pac derivative containing <i>55-lux</i>   |                      |
| 68 |                     | transcriptional fusion carrying nucleotides     |                      |
| 69 |                     | -881/+153 of <i>y3555</i> gene, Km <sup>R</sup> | This study           |
| 70 | pCS:: <i>P54</i>    | pCS26-pac derivative containing <i>54-lux</i>   |                      |
| 71 |                     | transcriptional fusion carrying nucleotides     |                      |
| 72 |                     | -428/+130 of <i>y3554</i> gene, Km <sup>R</sup> | This study           |
| 73 | pCS:: <i>P53</i>    | pCS26-pac derivative containing <i>53-lux</i>   |                      |
| 74 |                     | transcriptional fusion carrying nucleotides     |                      |
| 75 |                     | -445/+116 of <i>y3553</i> gene, Km <sup>R</sup> | This study           |
| 76 | pCS:: <i>P55-54</i> | pCS26-pac derivative containing                 |                      |

|     |                  |                                                      |            |
|-----|------------------|------------------------------------------------------|------------|
| 77  |                  | transcriptional fusion carrying nucleotides          |            |
| 78  |                  | -881/+1355 of <i>y3555</i> gene, Km <sup>R</sup>     | This study |
| 79  | pCS::P5x         | pCS26-pac derivative containing                      |            |
| 80  |                  | transcriptional fusion carrying nucleotides          |            |
| 81  |                  | -915/+54 of <i>y3551</i> gene, Km <sup>R</sup>       | This study |
| 82  | pCS::P50         | pCS26-pac derivative containing                      |            |
| 83  |                  | transcriptional fusion carrying nucleotides          |            |
| 84  |                  | -403/+135 of <i>y3550</i> gene, Km <sup>R</sup>      | This study |
| 85  | pCS::P5x-51-50   | pCS26-pac derivative containing                      |            |
| 86  |                  | transcriptional fusion carrying nucleotides          |            |
| 87  |                  | -915/+800 of <i>y3551</i> gene, Km <sup>R</sup>      | This study |
| 88  | pKOBEG           | λRed and <i>sacB</i> plasmid for mutagenesis,        |            |
| 89  |                  | Cm <sup>R</sup>                                      | (6)        |
| 90  | pKD4             | pANTsg derivative template plasmid                   |            |
| 91  |                  | containing the kanamycin cassette for λRed           |            |
| 92  |                  | recombination, Ap <sup>R</sup>                       | (7)        |
| 93  | pTRc99A          | IPTG-inducible strong hybrid <i>trp/lac</i> promoter |            |
| 94  |                  | containing plasmid, Ap <sup>R</sup>                  | (8)        |
| 95  | pCR4-TOPO        | Cloning vector, Km <sup>R</sup> , Ap <sup>R</sup>    | Invitrogen |
| 96  | pCR4::3550       | pCR4-TOPO derivative expressing                      |            |
| 97  |                  | <i>y3550</i> , Km <sup>R</sup> , Ap <sup>R</sup>     | This study |
| 98  | pCR4::3555       | pCR4-TOPO derivative expressing                      |            |
| 99  |                  | <i>y3555</i> , Km <sup>R</sup> , Ap <sup>R</sup>     | This study |
| 100 | pUC18R6KminiTn7T | pUC18 derivative plasmid enabling                    |            |
| 101 |                  | insertion of genes into <i>attTn7</i>                |            |
| 102 |                  | transposon insertion site located between            |            |

|     |                                |                                                              |                 |
|-----|--------------------------------|--------------------------------------------------------------|-----------------|
| 103 |                                | the <i>glmS</i> and <i>pstS</i> genes in the                 |                 |
| 104 |                                | chromosome, Ap <sup>R</sup>                                  | (9)             |
| 105 | E5049:: <i>km</i> <sup>R</sup> | pUC18R6KminiTn7T plasmid with                                |                 |
| 106 |                                | kanamycin resistance cassette cloned                         |                 |
| 107 |                                | in between transposition mediating sites                     | This study      |
| 108 | pTRc50                         | pTRc99A derivative contains <i>y3550</i> gene                | This study      |
| 109 | pTRc51                         | pTRc99A derivative contains <i>y3551</i> gene                | This study      |
| 110 | pTRc55                         | pTRc99A derivative contains <i>y3555</i> gene                | This study      |
| 111 | pTRc50_55                      | pTRc99A derivative contains <i>y3550</i> and <i>y3555</i>    | This study      |
| 112 | pTRc51_55                      | pTRc99A derivative contains <i>y3551</i> and <i>y3555</i>    | This study      |
| 113 |                                |                                                              |                 |
| 114 | pET28a                         | Protein Expression vector allowing 6xHis                     |                 |
| 115 |                                | tagging of a gene                                            | EMD Biosciences |
| 116 | pET28a:: <i>y3551</i>          | pET28a derivative contains <i>y3551</i> gene                 | This study      |
| 117 | pET28a:: <i>y3550</i>          | pET28a derivative contains <i>y3550</i> gene                 | This study      |
| 118 | pET28a:: <i>y3555</i>          | pET28a derivative contains <i>y3555</i> gene                 | This study      |
| 119 | pFLP3                          | Source of Flp recombinase, Tc <sup>R</sup> , Ap <sup>R</sup> | (9)             |

120 -----

121 The coordinates for the *lux* fusions are indicated with respect to the translational start codon for each  
122 gene. Kan<sup>R</sup>, kanamycin resistance; Ap<sup>R</sup>, ampicillin resistance; Tc<sup>R</sup>, tetracycline resistance.

123

124 **TABLE S2 Oligonucleotides used in this study**

125 -----

| 126 | Primer                         | Sequence (5'-3')                        | RE    |
|-----|--------------------------------|-----------------------------------------|-------|
| 127 | -----                          |                                         |       |
| 128 |                                |                                         |       |
| 129 | <u>For lux fusions</u>         |                                         |       |
| 130 | 50R-BHI                        | TAAGGATCCATTGGCATTCCATGCCAC             | BamHI |
| 131 | 50F-XhoI                       | TAACTCGAGTTTATGCTGATTATTTTAAAGGAAC      | XhoI  |
| 132 | 5xR-BHI                        | GAGGGATCCGGCCAATAGCGGAAGGTGC            | BamHI |
| 133 | 5xF-XhoI                       | AGGCTCGAGGAACTTTTATACAATGGAACGTG        | XhoI  |
| 134 | 53R-BHI                        | AACGGATCCAGGATGATAATCTGAAAATTC          | BamHI |
| 135 | 53F-XhoI                       | TGCCTCGAGCTGTAGTAGTCGACTGGCTC           | XhoI  |
| 136 | 54R-BHI                        | AGCGGATCCAATGCGGTCATGTCAAAG             | BamHI |
| 137 | 54F-XhoI                       | AATCTCGAGCGTTCTCTTTGGCTGTACCG           | XhoI  |
| 138 | 55R-BHI                        | CGGGGATCCAAGGATCTGCCCAGCACAAC           | BamHI |
| 139 | 55F-XhoI                       | GAACTCGAGTGATTCATGATTAACCGAAATGC        | XhoI  |
| 140 |                                |                                         |       |
| 141 | <u>For RT-PCR analysis</u>     |                                         |       |
| 142 | 5051RTR (B <sub>rt</sub> )     | CATCAGCAGGCGTGGCCC                      |       |
| 143 | Y3555Set2Fw (A <sub>rt</sub> ) | AAATACCTCTTCTCAGGCGGGCAT                |       |
| 144 |                                |                                         |       |
| 145 | <u>Gene deletion</u>           |                                         |       |
| 146 | 3550-H1P1                      | CAATAATGGAGAGTTATCATGAATAGACGTGTAATCAAT |       |
| 147 |                                | <u>CCCTGTGTAGGCTGGAGCTGCTTCG</u>        |       |
| 148 | 3550-H2P2                      | CTACTCTTCATTTTATTATCAGCCCAAGCAAGCAGTCGC |       |
| 149 |                                | <u>TTCCATATGAATATCCTCCTTAGTTC</u>       |       |
| 150 | 3555-H1P1                      | TTATTAAAGGGGAATACCATGAATACGATTAGAAGAAAA |       |

151 ATGTGTGTAGGCTGGAGCTGCTTCG

152 3555-H2P2 CGCTAACTGCATTAATGCCTGTTGGATTTCGAGTCAAAC

153 TGCCATATGAATATCCTCCTTAGTTC

154 3551-H1P1 TAAAATAGAGGATATATCATGAAGTCAGTCATTGAAACA

155 AAATGTAGGCTGGAGCTGCTTC

156

157 For cloning

158 p270 ACGGATCCATGAATAGACGTGTAATCAATCCCG

159 p271 CACTCGAGTCAGCCCAAGCAAGCAGTCGC

160 p272 ACGGATCCATGAAGTCAGTCATTGAAACAAAAAATGC

161 p273 CACTCGAGTCAAACCCCAGCAATAACTTCTATTTTC<sup>1</sup>

162 p274 ACGGATCCATGAATACGATTAGAAGAAAAATGCGTC

163 p275 CACTCGAGTTATCCATGGCAGATCCCCTTTTCC

164 p508 CGATAAGCTTGATTTAGTAAGCCTGTGATTTGC

165 p509 TGTGAAGCTTATCCATGGCAGATCCCCTTTTCC

166 p395/pKD4KanF ATTAGGATCCGAACACGTAGAAAGCCAGTCC

167 p396/pKD4KanR CAGCGAATTCTCAGAAGAACTCGTCAAGAAGGC

168 pstSup2 GCTATACGTGTTTGCTGATCAAGATGC (9)

169 pTn7R CACAGCATAACTGGACTGATTTTC (9)

170 3550-R CGC CCA TTT AAT GAT GAG TGC

171 3550-F TCC CAC TGC TGA TTA GTA TCG

172 3555-R CAA CAC CGG ACT GAG CGA TC

173 3555-F ATT TTG TGT CAA CTG ACT GAT TG

174

175 For qPCR

176 y3550Set1Fw GCATGGAATGCCAATGGCGAGTTA

|     |              |                          |
|-----|--------------|--------------------------|
| 177 | y3550Set1Rev | TAGACGTACAACATCAGCAGGCGT |
| 178 | y3551Set1Fw  | TGCTTCAGGGCAGATACCGATCAA |
| 179 | y3551Set1Rev | GTTCCAGCCTGTAGAAGAACAGCA |
| 180 | y3553Set1Fw  | TCATCCTGGTGCTGTTTCGTAGT  |
| 181 | y3553Set1Rev | TCCATCAGACATTTCAACTCGCCG |
| 182 | y3554Set3Fw  | GCATCATTGGTATTCTGCGTGCCA |
| 183 | y3554Set3Rev | CGCCAACTAATGCGGTTGCGATAA |
| 184 | y3555Set2Fw  | AAATACCTCTTCTCAGGCGGGCAT |
| 185 | y3555Set2Rev | ATGAGAGGAACCCACTTTCAGGCA |
| 186 | gyrBFw       | TCGCCGTGAAGGTAAAGTTC     |
| 187 | gyrBRv       | TTTGCTCAGTTTCACCCACC     |

---

188

189



190  
191

Protein %ID

|               |        |        |        |        |        |
|---------------|--------|--------|--------|--------|--------|
| 1: Y3555      | 100.00 | 20.17  | 19.88  | 15.80  | 18.97  |
| 2: Y2760_AspC | 20.17  | 100.00 | 85.86  | 41.41  | 42.42  |
| 3: Se_AspC    | 19.88  | 85.86  | 100.00 | 42.17  | 42.42  |
| 4: Y0579_TyrB | 15.80  | 41.41  | 42.17  | 100.00 | 72.80  |
| 5: Se_TyrB    | 18.97  | 42.42  | 42.42  | 72.80  | 100.00 |

192  
193

194 Y3555 1 ----MNTIRRKMRPEFQGLQGGFLFSSVKKKADVGTAVLD-----LMANGVDM--L  
195 Y2760\_AspC 1 MEASDMF-----EKKIT-AAPADPILG-LTDIFRADDRAHK-INLIGIG  
196 Y0579\_TyrB 1 ----MF-----QNVDA-YAGDPILS-LMSEFKADNRAHK-VNLSIG  
197 STM0998\_AspC 1 ----MF-----ENIT-AAPADPILG-LADLFRADDRPGK-INLIGIG  
198 STM4248\_TyrB 1 ----MF-----QKVDAYAGDPILS-LMERFKDDSRHDK-VNLSIG

199  
200

201 Y3555 44 CWADPFFPDPVLP--EHTSQAVIKSMEE--NGSASHYTMPICNPPELKEKTIALKLQRYNNLT  
202 Y2760\_AspC 40 VYKDETGKTPVLT---SVKKAEQYLLE-N-EATKKNYLIGIDGLPVFASCTQELLFGANSAT  
203 Y0579\_TyrB 35 LYYNEQGEIPQMQ---AVDAEAAQLSTQP-HCTPVYLPMEGLQSYRTAIQQLLFGHDHPM  
204 STM0998\_AspC 35 VYKDETGKTPVLT---SVKKAEQYLLE-N-ETTKKNYLIGIDGLPEEFARCTQELLFGKGSAL  
205 STM4248\_TyrB 35 LYYNEDGIIPQLK---IVAEAEARLNAQP-HCASLYLPMEGLINTYRHTIAPLLFGADHPV

206  
207

208 Y3555 100 VEAQR-NILITPGSDSGLLFAMPPFIN---NDDEVLIHSPSYPSNFLNVELLGGKPIISVE  
209 Y2760\_AspC 95 IADKRARTAQTGGTGLLRIAA-DFTIAHQTSAKRVVWSNPSWPNHKNVFEAAGLEVVEYA  
210 Y0579\_TyrB 91 LVQQRVATIQTVGGSGALKVGA-DFLNHYFPDSQVWVSDPTWENHVAIFSGAGFKVNTYYP  
211 STM0998\_AspC 90 IADKRARTAQTGGTGLLRIAA-DFLAKNTPVKRVVWSNPSWPNHKSVEFNAAGLEVREYA  
212 STM4248\_TyrB 91 LVQQRVATIQTVGGSGALKVGA-DFLKRYFPDAGVWVSDPTWENHVAIFAGAGFEVSTYYP

213  
214

215 Y3555 156 LKAENNFQDIKDFENKITEK-TKMVILTN--PNNPTGTVLRRESLQAIADFIIA-----  
216 Y2760\_AspC 154 YYDAANHALDFDGLLNSLSEAQAGDVVLFHGCCHNPTGIDPTETQWSQLAELISVA-----  
217 Y0579\_TyrB 150 YFDNDKLAVKFDPMLATLQQLPARSIVLLHPCCHNPTGSDLTNAQWDRLIDVVKE-----  
218 STM0998\_AspC149 YYDAENHTLDFEALQASLSEAQAGDVVLFHGCCHNPTGIDPTLEQWQVLAELISVE-----  
219 STM4248\_TyrB150 WYDDATNGIRENDLLATLNTLPARSIVLLHPCCHNPTGADLTPSQWDVAIEIVKA-----

220  
221

222 Y3555 208 -HDLILVVVDQAFE---DAIFDEIEFISIASIPGMWERTVSVFVSFKMGISGFRVGYLVA  
223 Y2760\_AspC 209 -KGLVPLFDFAFAYQGFANGLBEDAQG--IRIFAATHQELIVCSSYSKNFGLYNERVGACTL  
224 Y0579\_TyrB 205 -RELIPFLDIAYQGFAGLNEDAYA--IRAMAAGVLPCLISNSFSKIFISLYNERVGGLSV  
225 STM0998\_AspC204 -KGLVPLFDFAFAYQGFANGLBEDAEG--IRAFAAHKELVASSYSKNFGLYNERVGACTL  
226 STM4248\_TyrB205 -RDLIPFLDIAYQGFAGMDDDAYV--IRATASAGLPALVSNFSKIFISLYGERVGGLSV

227  
228

229 Y3555 264 ---DAQIVDVLFGCTVNVVVGATNTS---SQAGMIAAI-DEPSFMCEYITQIFER-----  
230 Y2760\_AspC 266 VAADSNVADTAESQVKAVIRANYSNPPAHGASVVATILSNAALRAIWEQELTDMRORIQR  
231 Y0579\_TyrB 262 VCESDEAAGRVLGQLKATVRRNYSSPPNFGAQVVSKVINDTVLRAQWQAEVEQMRLRILD  
232 STM0998\_AspC261 VAADAETVDRAESQMKSAIRANYSNPPAHGASIVATILSNDALRAIWEQELTDMRORIQR  
233 STM4248\_TyrB262 VCEDAETIARVLGQLKATVRRNIYSSPPCFGAQVVATVVGDEALKAGWLAEVDAMRNRIIS

234  
235

236 Y3555 310 RRKVVVFEMNNAIPGVCMVMPESGFLSWIDISKLGTSTFICDYLLQHAHVMVNSGVVPGQG  
237 Y2760\_AspC 326 MRQLFVNTLQ-----EKGAQQDF-----SFIINQNGMFSFSGLTIKEQV  
238 Y0579\_TyrB 322 MRHTLVEALK-----ASIPERNE-----DYLLQQRGMFSYTGFSQAQV  
239 STM0998\_AspC321 MRQLFVNTLQ-----EKGANRDF-----SFIINQNGMFSFSGLTIKQV  
240 STM4248\_TyrB322 MRQTLVKELK-----AEMPDRNE-----DYLLQQRGMFSYTGFSSEEQV

241  
242

```

243 Y3555      370 GEGYIRLVHGCKDDEKIYAVLT-RIQQALMQLAKEKGI CHG-----
244 Y2760_AspC 364 ----LR-----LRDEFVAVYAVNSGRVNVAGMTPDNMAPLCEA-----
245 Y0579_TyrB 360 ----ES-----LRREFGVYLIASGRMCMAGVNHQNVQVAVA-----
246 STM0998_AspC359 ----LR-----LRREFGVYAVASGRVNVAGMTPDNMAPLCEA-----
247 STM4248_TyrB360 ----DR-----LRREFGVYLIASGRMCMVAGLNASNVHRVAKA-----

```

248  
249

```

250 Y3555      -----
251 Y2760_AspC 397 IVAVL
252 Y0579_TyrB 393 FAAVQ
253 STM0998_AspC392 IVAVL
254 STM4248_TyrB393 FAAVM

```

255  
256

257 **Figure S1. Alignments of the Y3555 and *Y. pestis* KIM6+ and *S. enterica* AspC and**

258 **TyrB.** \* denotes the glutamate instead of aspartate that is predicted to coordinate the

259 pyridine nitrogen of PLP in the active site

260

261

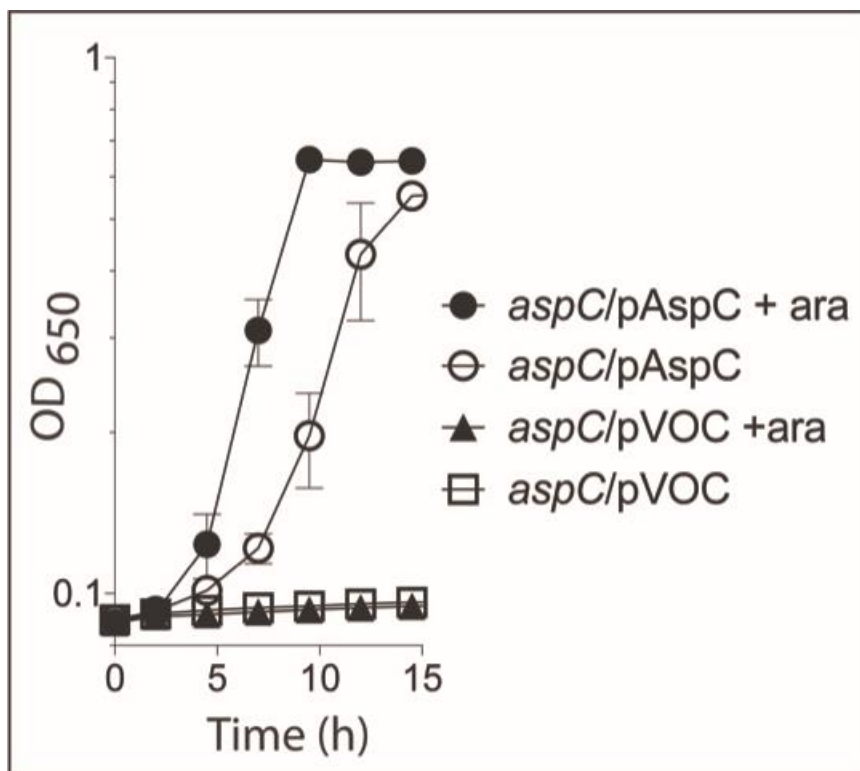

262

263

264

265

266

**Figure S2. *S. enterica aspC* expressed *in trans* complements growth defects of an *S.***

***enterica aspC* mutant** The *S. enterica aspC789::km* mutant (DM16150) with either a

pBAD24 empty vector control (*aspC/pVOC*), or a pBAD24 plasmid expressing *S. enterica*

*aspC* (*aspC/pAspC*) were grown in minimal glucose (11 mM) medium without, or with 0.2%

arabinose (+ara) as indicated in legend. Error bars represent mean( $\pm$ SEM) from three

biological replicates.

272

273

274

275

276

277

278 Protein %ID

|               |        |        |        |        |        |        |        |        |        |
|---------------|--------|--------|--------|--------|--------|--------|--------|--------|--------|
| 1: Y3555      | 100.00 | 86.59  | 86.59  | 86.59  | 86.83  | 19.60  | 19.03  | 16.43  | 18.70  |
| 2: 07704      | 86.59  | 100.00 | 98.05  | 98.05  | 98.29  | 19.03  | 18.47  | 16.71  | 17.85  |
| 3: 072382     | 86.59  | 98.05  | 100.00 | 100.00 | 99.76  | 19.60  | 18.75  | 15.86  | 17.85  |
| 4: 093506     | 86.59  | 98.05  | 100.00 | 100.00 | 99.76  | 19.60  | 18.75  | 15.86  | 17.85  |
| 5: Se_AspB    | 86.83  | 98.29  | 99.76  | 99.76  | 100.00 | 19.60  | 18.75  | 15.86  | 17.85  |
| 6: Y2760_AspC | 19.60  | 19.03  | 19.60  | 19.60  | 19.60  | 100.00 | 85.86  | 41.41  | 42.42  |
| 7: Se_AspC    | 19.03  | 18.47  | 18.75  | 18.75  | 18.75  | 85.86  | 100.00 | 42.17  | 42.42  |
| 8: Y0579_TyrB | 16.43  | 16.71  | 15.86  | 15.86  | 15.86  | 41.41  | 42.17  | 100.00 | 72.80  |
| 9: Se_TyrB    | 18.70  | 17.85  | 17.85  | 17.85  | 17.85  | 42.42  | 42.42  | 72.80  | 100.00 |

279

280

281

282

283

284

285

286

287

288

289

290

291

292

293

294

295

296

297

298

299

300

301

302

303

304

305

306

307

308

309

310

311

312

313

314

315

316

317

318

319

320

321

322

323

324

|              |   |                                   |                            |
|--------------|---|-----------------------------------|----------------------------|
| Y3555        | 1 | MNTIRRKMRPEFQGLQGGLFSSVKKADVGTAVL | DLMANGVDM-----LCWADPFFPDP  |
| Y2760_AspC   | 1 | MEASD-----MFEKITT-AAPADPILGLT     | DI FRADDRAHKINLIGICVYKDETG |
| Y0579_TyrB   | 1 | M-----FQNVDA-YAGDPIISLME          | SFKADNRAHKVNLISIGLYYNEQG   |
| STM0998_AspC | 1 | M-----FENIT-AAPADPILGLADL         | FRADDRPGKINLIGICVYKDETG    |
| STM4248_TyrB | 1 | M-----FQKVD-AYAGDPIISLME          | RFKD DSRHDKVNLISIGLYYNEGD  |
| 07704        | 1 | MSTIRRKMRPVFQGLQGGLFSSVKKADVGTAVL | ELMANGVDM-----LCWADPFFPDS  |
| 072382       | 1 | MSTIRRKMRPVFQGLQGGLFSSVKKADVGTAVL | ELMANGVDM-----LCWADPFFPDS  |
| 093506       | 1 | MSTIRRKMRPVFQGLQGGLFSSVKKADVGTAVL | ELMANGVDM-----LCWADPFFPDS  |
| Se_AspB      | 1 | MSTIRRKMRPVFQGLQGGLFSSVKKADVGTAVL | ELMANGVDM-----LCWADPFFPDS  |

|              |    |                       |                                           |
|--------------|----|-----------------------|-------------------------------------------|
| Y3555        | 54 | VLPE--HISQAVIKSM--ENG | SASHYTMPIGNPDLKEKIALKLRKNNISVDAQRNIIIT    |
| Y2760_AspC   | 47 | KTPVLTSSVKKAEQYL--ENE | ATKNYLGIDGLPFVFACTQELLFGANSALITADKRRTAQT  |
| Y0579_TyrB   | 42 | EIPQMQAVDAAEAQLSTQ    | PHGTPVYLPMEGLQSYRTAQQQLFGHDHPMLVQQRVATIQT |
| STM0998_AspC | 42 | KTPVLTSSVKKAEQYL--ENE | TTKNYLGIDGIPFARCTQELLFGKGSALINDKRRTAQT    |
| STM4248_TyrB | 42 | IIPQLKTVAEAEARLNAQ    | PHGASLYLPMEGLNTYRHTIAPLLFGADHPVLQQRVATIQT |
| 07704        | 54 | VLPE--HISQAVIKSM--KNG | NASHYTMPIGNPDLKEKIALKLRKNNISVDAQRNIIIT    |
| 072382       | 54 | VLPE--HISQAVIKSM--ENG | NASHYTMPIGNPDLKEKIALKLRKNNISVDAQRNIIIT    |
| 093506       | 54 | VLPE--HISQAVIKSM--ENG | NASHYTMPIGNPDLKEKIALKLRKNNISVDAQRNIIIT    |
| Se_AspB      | 54 | VLPE--HISQAVIKSM--ENG | NASHYTMPIGNPDLKEKIALKLRKNNISVDAQRNIIIT    |

|              |     |                       |                                              |
|--------------|-----|-----------------------|----------------------------------------------|
| Y3555        | 110 | PGSDSGLLFAMMPFIENN--- | DDEVLIHSPSYPSNFLNVELLGGKPIISVELKAENNFOIEI    |
| Y2760_AspC   | 106 | PGGT--GGLRIAADFIAHQ   | TSAKRVWVSNPSWPNHKNVFEAAGLEVVEYAYYDAANHALDF   |
| Y0579_TyrB   | 102 | VGGG--GALKVGADEFLNH   | YFPDSQVWVSDPTWENHVAIFSGAGFKVNTYPYFDNDKLVKFK  |
| STM0998_AspC | 101 | PGGT--GALRIAADFIAK    | NTPVKRVWVSNPSWPNHKSVFNAAGLEVREYAYYDAENHTLDF  |
| STM4248_TyrB | 102 | LGGS--GALKVGADEFIK    | RYPDAGVWVSDPTWENHIAIFAGAGFEVSTYPWYDITATNGIRF |
| 07704        | 110 | PGSDSGLLFAMMPFIENN--- | GDEVLIHSPSYPSNFLNVELLGGTPVSVELKAENNFOIEI     |
| 072382       | 110 | PGSDSGLLFAMMPFIENN--- | GDEVLIHSPSYPSNFLNVELLGGTPVSVELKVENNFOIEI     |
| 093506       | 110 | PGSDSGLLFAMMPFIENN--- | GDEVLIHSPSYPSNFLNVELLGGTPVSVELKVENNFOIEI     |
| Se_AspB      | 110 | PGSDSGLLFAMMPFIENN--- | GDEVLIHSPSYPSNFLNVELLGGTPVSVELKVENNFOIEI     |

|              |     |                     |                                             |
|--------------|-----|---------------------|---------------------------------------------|
| Y3555        | 167 | KDFENKITEK--TKMVILT | N--PNNPTGTVLRRESLQALADFIIAHDLLVVDQAFED---   |
| Y2760_AspC   | 165 | DGLLNSLSEAQAGDVVLF  | HGCCHNPTGIDPTETQWSQLAEFLSVAKGWLPIDDFAYQGFAN |
| Y0579_TyrB   | 161 | DPMLATLQQLPARSIV    | LLHPCCHNPTGSDITNAQWDRIIDVVKERELIPFDIAYQGFGA |
| STM0998_AspC | 160 | EALQASLSEAQAGDVVLF  | HGCCHNPTGIDPTLEQWQVLAFLSVEKGWLPIDDFAYQGFAR  |
| STM4248_TyrB | 161 | NDLLATLNTLPARSIV    | LLHPCCHNPTGADLTPSQWDAMIEIVKARDLIPFDIAYQGFGA |
| 07704        | 167 | SDFEEKITEK--TKMVILT | N--PNNPTGTVLRRESLQALADFVIDHDLMLVVDQAFED---  |
| 072382       | 167 | SDFEEKITEK--TKMVILT | N--PNNPTGTVLRRESLQALADFVIDHDLMLVVDQAFED---  |
| 093506       | 167 | SDFEEKITEK--TKMVILT | N--PNNPTGTVLRRESLQALADFVIDHDLMLVVDQAFED---  |

```

325 Se_AspB 167 SDFEEKITEK-TKMVILTN--PNNPTGTVLRRESLQALADFVIDHDLMVLVVDQAFED---
326
327
328 Y3555 221 AIFDEIEFISIASLPGMWERTISVFSFSKMGGLSGFRVGYL---VADAQIIVDVLIFGCTVN
329 Y2760_AspC 225 GIEEDAQG--LRIFAATHQELIVCSSYSKDNFGLYNERVGACTLVAADSNVADTAFISQVKA
330 Y0579_TyrB 221 GINEDAYA--IRAMAAGLPCILISNSFSKIFSLYNERVGGISVVCESDEAAGRVLGQLKA
331 STM0998_AspC220 GIEEDAEG--LRAFAALHKELIVASSYSKDNFGLYNERVGACTLVAADAETVDRAFISQVKA
332 STM4248_TyrB221 GMDDDAYV--IRATASAGLPAIVSNFSKIFSLYGERVGGISVVCEDAETIARVLGQLKA
333 07704 221 AIFDNIEFISIASLPGMWERTISVFSFSKMGGLSGFRVGYL---VADDHIMDALYGCTVN
334 072382 221 AIFDNIEFISIASLPGMWERTISVFSFSKMGGLSGFRVGYL---VADDHIMDALYGCTVN
335 093506 221 AIFDNIEFISIASLPGMWERTISVFSFSKMGGLSGFRVGYL---VADDHIMDALYGCTVN
336 Se_AspB 221 AIFDNIEFISIASLPGMWERTISVFSFSKMGGLSGFRVGYL---VADDHIMDALYGCTVN
337
338
339 Y3555 278 VVGATNTSSQ---AGM-----IAALDEPSFMGEYTIQIFERRRKVVFEMMN--AIPG
340 Y2760_AspC 283 VTRANYSNPPAHGASVATILSNAALRAIWEQELTDMRCRIQMRQLFVNTLQEKGAQQD
341 Y0579_TyrB 279 TVRRNYS SPPNFGAQVSKVLNDTVLRAQWQAEVEQMLRLRILDMRHTLVEALKASLPERN
342 STM0998_AspC278 ATRANYSNPPAHGASIVATILSNDALRAIWEQELTDMRCRIQMRQLFVNTLQEKGANRD
343 STM4248_TyrB279 TVRRIYS SPPCFGAQVATVLGDEALKAGWLAEVDAMRNRIISMRQTLVKEIKAE MPDRN
344 07704 278 VVGATNTSSQ---AGM-----IAALNDEPSFIDTYNQIFDHRRKVVFEMMN--AIPG
345 072382 278 VVGATNTSSQ---AGM-----IAALNEPSFIDTYNQIFDHRRKVVFEMMN--AIPG
346 093506 278 VVGATNTSSQ---AGM-----IAALNEPSFIDTYNQIFDHRRKVVFEMMN--AIPG
347 Se_AspB 278 VVGATNTSSQ---AGM-----IAALNEPSFIDTYNQIFDHRRKVVFEMMN--AIPG
348
349 Y3555 324 VSMVMPESGFLSWIDISKLGSSAFICDYLLQHAHVMVNSGVVPYGE GEGGYIRLVHGCIYKD
350 Y2760_AspC 343 FSFLINQNGMFSFSGLTKQVLRRL----RDEFVAVYAVNSGR-----VN-VAGMTPD
351 Y0579_TyrB 339 FDYLLQQRGMFSYTGFSQAQVESL----REEFGVYLIASGR-----MC-MAGVNHQ
352 Se_AspC 338 FSFLIKQNGMFSFSGLTKDQVLRRL----REEFGVYAVASGR-----VN-VAGMTPD
353 Se_TyrB 339 FDYLLQQRGMFSYTGFSQAQVDRRL----RDEFVYLIASGR-----MC-VAGLNAS
354 07704 324 VSMVMPESGFLSWIDISKLGSSAFICDYLLQHAHVMVNSGVVPYGE GEGGYIRLVHGCIYKD
355 072382 324 VSMVMPESGFLSWIDISKLGSSAFICDYLLQHAHVMVNSGVVPYGE GEGGYIRLVHGCIYKD
356 093506 324 VSMVMPESGFLSWIDISKLGSSAFICDYLLQHAHVMVNSGVVPYGE GEGGYIRLVHGCIYKD
357 Se_AspB 324 VSMVMPESGFLSWIDISKLGSSAFICDYLLQHAHVMVNSGVVPYGE GEGGYIRLVHGCIYKD
358
359
360 Y3555 384 D-EKLYAVLTRIQQALMQLAKEKGLDHE
361 Y2760_AspC 389 NMAPLCEATVAVL-----
362 Y0579_TyrB 385 NVEQVAVAFAAVQ-----
363 Se_AspC 384 NMAPLCEATVAVL-----
364 Se_TyrB 385 NVHRVAKAFAAVM-----
365 07704 384 D-EKLFVAVLTRIQSALTM LAKEKGLDHE
366 072382 384 D-EKLCVAVLTRIQSALTM LAKEKGLDHE
367 093506 384 D-EKLCVAVLTRIQSALTM LAKEKGLDHE
368 Se_AspB 384 D-EKLCVAVLTRIQSALTM LAKEKGLDHE
369
370
371
372

```

373 **Figure S3. Alignments of Y3555 and 07704, 072382, 093506, AspB from CDC isolates**  
374 **of *S. enterica*.** \*denotes the glutamate instead of aspartate that is predicted to coordinate  
375 the pyridine nitrogen of PLP in the active site.

376

377 **SUPPLEMENTAL REFERENCES**

378

379 1. **Une T, Brubaker RR.** 1984. *In vivo* comparison of avirulent Vwa- and Pgm- or Pstr  
380 phenotypes of yersiniae. *Infect Immun* **43**:895-900.

381 2. **Fukuto HS, Svetlanov A, Palmer LE, Karzai AW, Bliska JB.** 2010. Global gene  
382 expression profiling of *Yersinia pestis* replicating inside macrophages reveals the  
383 roles of a putative stress-induced operon in regulating type III secretion and  
384 intracellular cell division. *Infect Immun* **78**:3700-3715.

385 3. **Lambrecht JA, Browne BA, Downs DM.** 2010. Members of the  
386 YjgF/YER057c/UK114 family of proteins inhibit phosphoribosylamine synthesis in  
387 vitro. *J Biol Chem* **285**:34401-34407.

388 4. **Ernst DC, Lambrecht JA, Schomer RA, Downs DM.** 2014. Endogenous synthesis  
389 of 2-aminoacrylate contributes to cysteine sensitivity in *Salmonella enterica*. *J*  
390 *Bacteriol* **196**:3335-3342.

391 5. **Bjarnason J, Southward CM, Surette MG.** 2003. Genomic profiling of iron-  
392 responsive genes in *Salmonella enterica* serovar *typhimurium* by high-throughput  
393 screening of a random promoter library. *J Bacteriol* **185**:4973-4982.

394 6. **Derbise A, Lesic B, Dacheux D, Ghigo JM, Carniel E.** 2003. A rapid and simple  
395 method for inactivating chromosomal genes in *Yersinia*. *FEMS Immunology &*  
396 *Medical Microbiology* **38**:113-116.

397 7. **Datsenko KA, Wanner BL.** 2000. One-step inactivation of chromosomal genes in  
398 *Escherichia coli* K-12 using PCR products. *Proc Natl Acad Sci U S A* **97**:6640-6645.

399 8. **Amann E, Ochs B, Abel KJ.** 1988. Tightly regulated tac promoter vectors useful for  
400 the expression of unfused and fused proteins in *Escherichia coli*. *Gene* **69**:301-315.

401 9. **Choi KH, Gaynor JB, White KG, Lopez C, Bosio CM, Karkhoff-Schweizer RR,**  
402 **Schweizer HP.** 2005. A Tn7-based broad-range bacterial cloning and expression  
403 system. *Nat Methods* **2**:443-448.

404

405
